# Supplementary material
Source: PubMed Central journal article supplement (PMC9115778)

Ext\_Fig7a\_total IR

Ext\_Fig7a\_pY IR

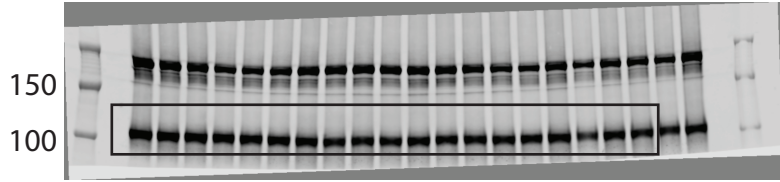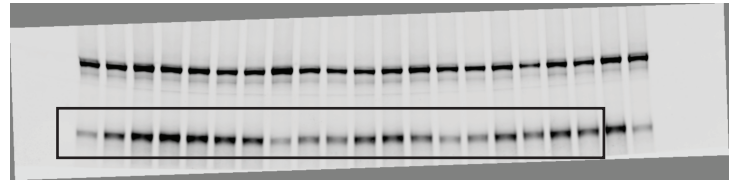

Ext\_Fig7a\_total AKT

Ext\_Fig7a\_pAKT

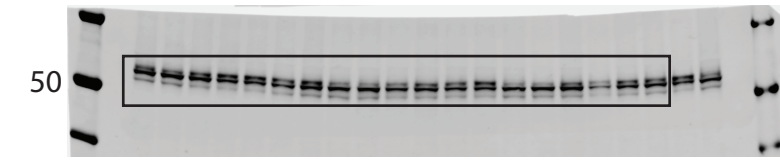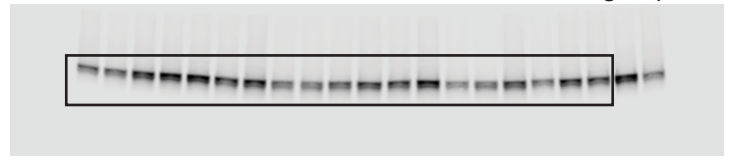

Ext\_Fig7a\_total ERK

Ext\_Fig7a\_pERK

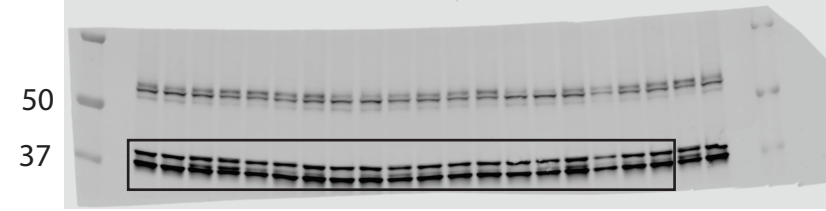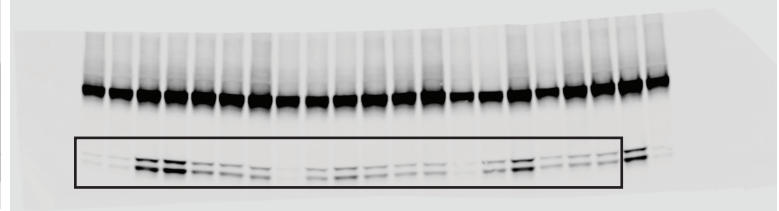

Ext\_Fig7c\_total IR

Ext\_Fig7c\_pY IR

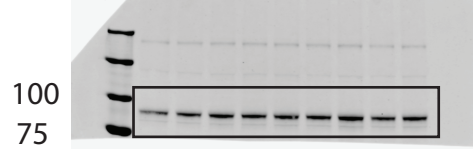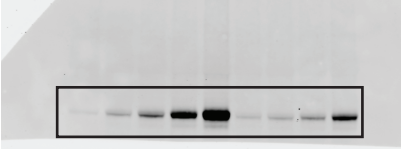

Ext\_Fig7c\_total AKT

Ext\_Fig7c\_pAKT

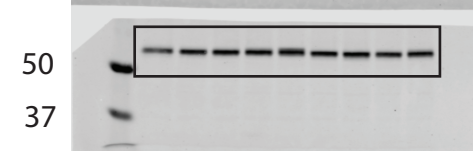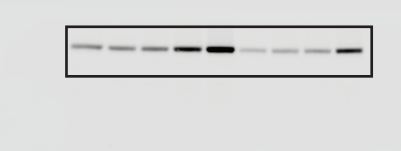

Ext\_Fig7c\_total ERK

Ext\_Fig7c\_pERK

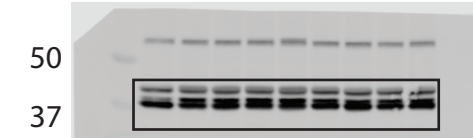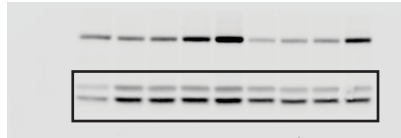

Ext\_Fig7d\_total IR

Ext\_Fig7d\_pY IR

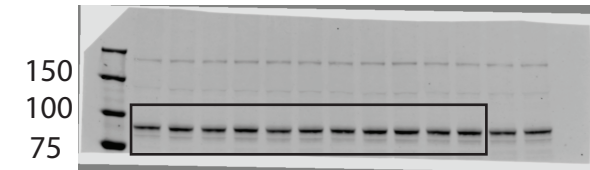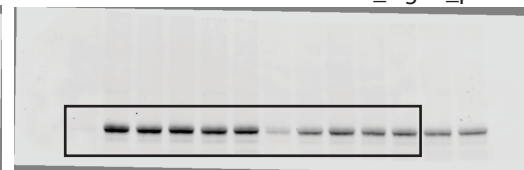

Ext\_Fig7d\_total AKT

Ext\_Fig7d\_pAKT

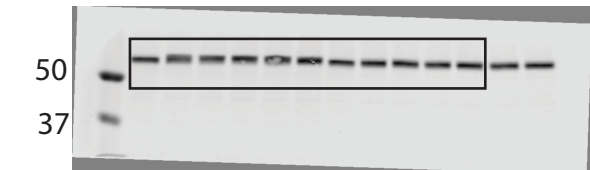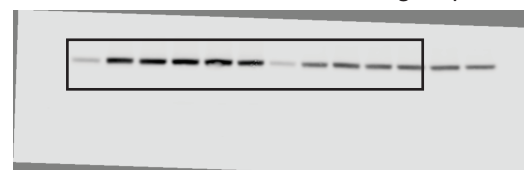

Ext\_Fig7d\_total ERK

Ext\_Fig7d\_pERK

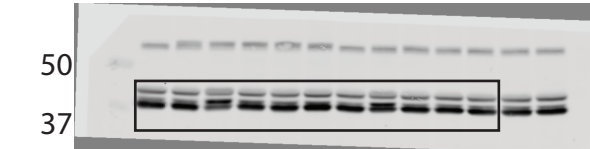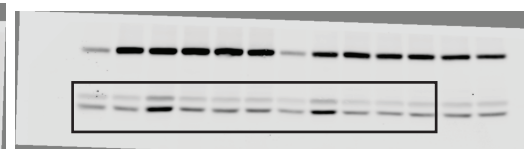

Supplement: NIHMS1798432-supplement-1798432_SD_ED_Fig_7_WB.pdf [file NIHMS1798432-supplement-1798432_SD_ED_Fig_7_WB.pdf]
