# Supplementary material
Source: PubMed Central journal article supplement (PMC9115778)

Ext Fig1c\_total IR

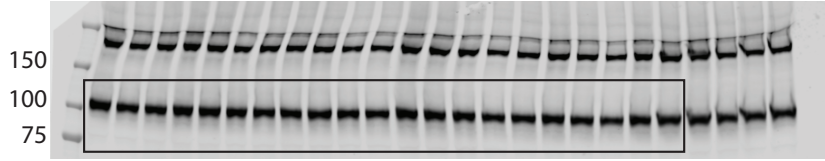

Ext Fig1c\_pY IR

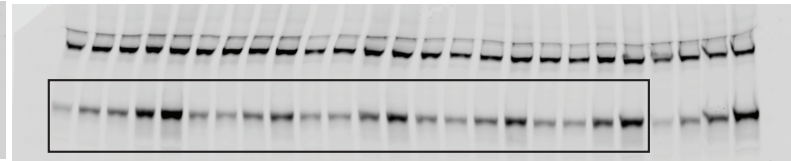

Supplement: NIHMS1798432-supplement-1798432_SD_ED_Fig_1_WB.pdf [file NIHMS1798432-supplement-1798432_SD_ED_Fig_1_WB.pdf]

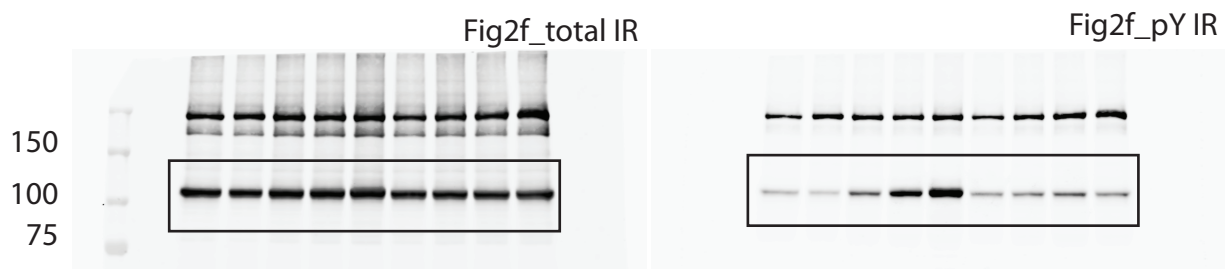

Supplement: NIHMS1798432-supplement-1798432_SD_Fig_2_WB.pdf [file NIHMS1798432-supplement-1798432_SD_Fig_2_WB.pdf]

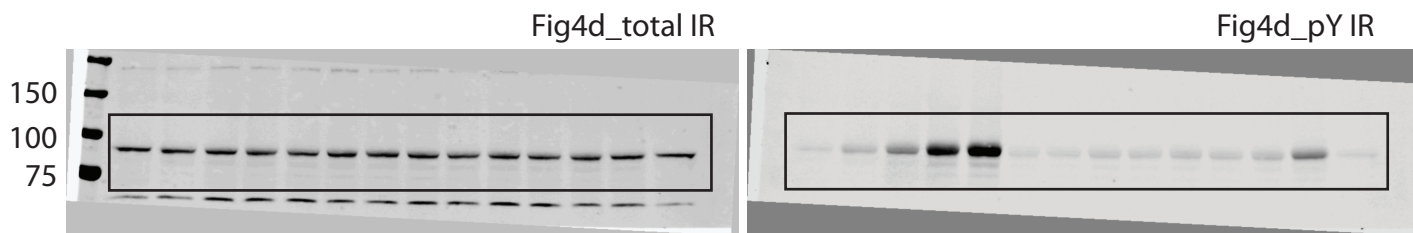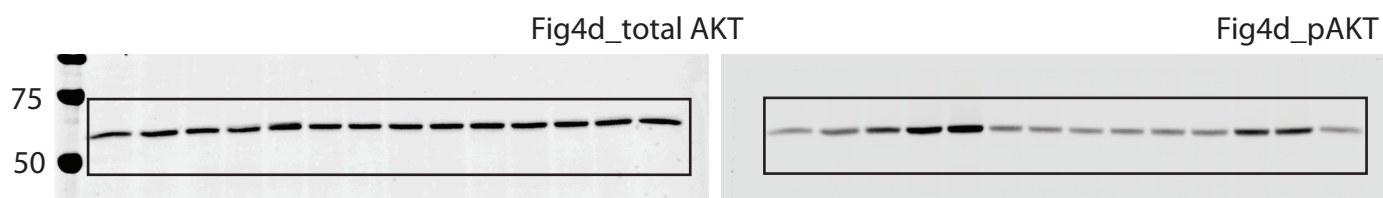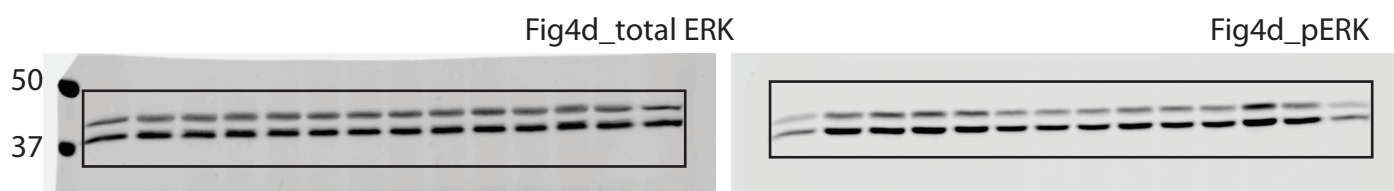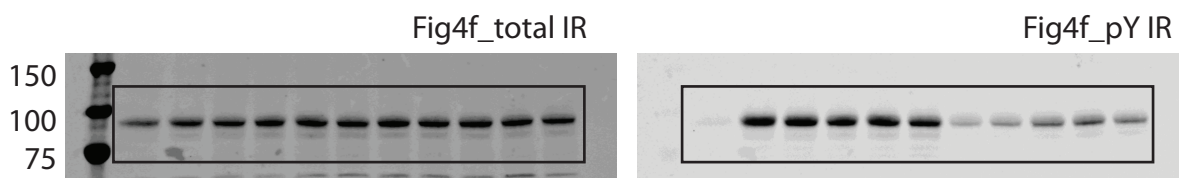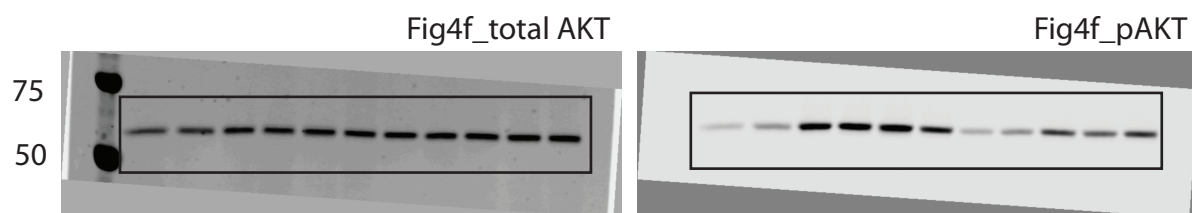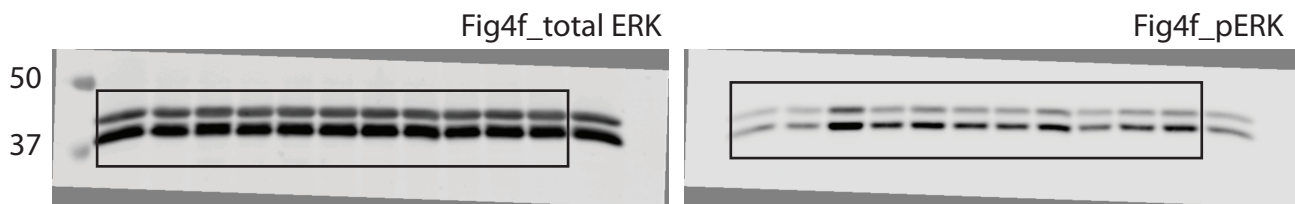

Supplement: NIHMS1798432-supplement-1798432_SD_Fig_4_WB.pdf [file NIHMS1798432-supplement-1798432_SD_Fig_4_WB.pdf]

Fig5c\_total IR (upper)

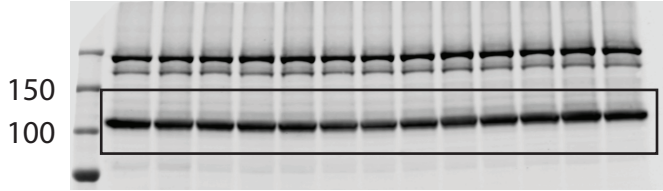

Fig5c\_pY IR (upper)

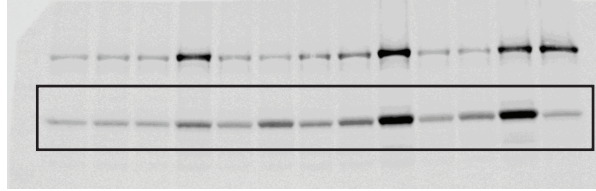

Fig5c\_total IR (bottom)

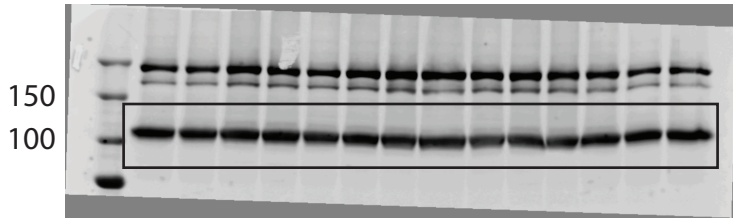

Fig5c\_pY IR (bottom)

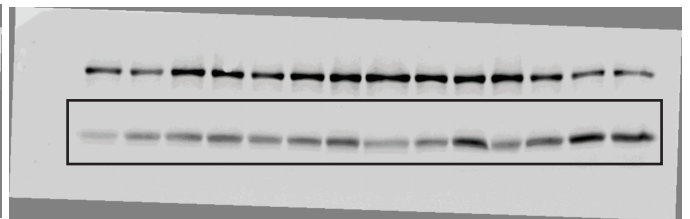

Supplement: NIHMS1798432-supplement-1798432_SD_Fig_5_WB.pdf [file NIHMS1798432-supplement-1798432_SD_Fig_5_WB.pdf]
